# Supplementary material
Source: PubMed Central journal article supplement (PMC1861147)
Supplement: heart_hrt.2005.085407_1.pdf [file heart_hrt.2005.085407_1.pdf]

Characteristics of the female patients by type of Fontan operation performed

D

| Pat                                       | Inclusion | Age at Fontan (years) | Age at Principa I CHD (years) | Surgical intervention(s)                                                  | Menarche (years) | Child wish | Approval of Pregnancy | Infer tility | Miscarriage (M) Aborti (A) |
|-------------------------------------------|-----------|-----------------------|-------------------------------|---------------------------------------------------------------------------|------------------|------------|-----------------------|--------------|----------------------------|
| RA-AP (atrio-pulmonary connection) Fontan |           |                       |                               |                                                                           |                  |            |                       |              |                            |
| A                                         | 45        | 16                    | DILV                          | I RA-AP<br>II Redo RA-AP, PDA closure                                     | 16               | Yes        | No                    | No           | No                         |
| B                                         | 26        | 6                     | TA                            | I Waterston<br>II RA-AP, ASD/VSD closure<br>III Redo RA-AP                | 16               | Yes        | No                    | No           | No                         |
| C                                         | 22        | 6                     | Complex                       | I Rashkind, BT<br>II Redo BT<br>III RA-AP                                 | 14               | No         | Yes                   | No           | No                         |
| D                                         | 44        | 24                    | Complex                       | I RA-AP, ASD closure<br>II Redo RA-AP                                     | 11               | Yes        | No                    | No           | No                         |
| E                                         | 29        | 11                    | DORV                          | I BT<br>II RA-AP                                                          | 16               | Yes        | No                    | No           | No                         |
| F                                         | 23        | 10                    | D-TGA                         | I BT, VSD closure<br>II Glenn, BT closure, atrial septectomy<br>III RA-AP | 16               | Yes        | Yes                   | No           | No                         |

|     | Age at  |         |          |                                                                             |         |          |           |        |        | Miscar |
|-----|---------|---------|----------|-----------------------------------------------------------------------------|---------|----------|-----------|--------|--------|--------|
|     | Inclusi | Age at  |          |                                                                             | Menar   | Approval |           |        |        | age (M |
|     | on      | Fontan  | Principa |                                                                             | che     | Child of |           | Infer  | Aborti |        |
| Pat | (years) | (years) | I CHD    | Surgical intervention(s)                                                    | (years) | wish     | Pregnancy | tility | (A)    |        |
| G   | 22      | 6       | DILV     | I BT<br>II RA-AP                                                            | 15      | No       | Unknown   | No     | No     | No     |
| H   | 21      | 5       | UVH      | I RA-AP +PA banding<br>+closure ASD                                         | 15      | No       | Unknown   | No     | No     | No     |
| I   | 25      | 8       | DORV     | I PA banding<br>II RA-AP                                                    | 13      | Yes      | Yes       | No     | No     | No     |
| J   | 25      | 4       | PAIVS    | I RA-AP<br>II Redo RA-AP                                                    | 17      | Yes      | Yes       | No     | No     | No     |
| K   | 24      | 5       | DILV     | I BT<br>II RA-AP                                                            | 12      | Yes      | Yes       | No     | No     | No     |
| L   | 23      | 4       | TA       | I Rashkind<br>II BT<br>III RA-AP, closure ASD                               | 14      | No       | Unknown   | No     | No     | No     |
| M   | 22      | 5       | DILV     | I PA banding<br>II BT, PA band removal<br>III RAAP<br>IV Damus-Kaye-Stansel | 13      | Yes      | No        | No     | No     | No     |
| N   | 27      | 10      | PAIVS    | I BT<br>II Glenn, pulmonary<br>arterioplasty, ASD/PDA<br>closure.           | 17      | Yes      | No        | No     | No     | No     |

|         | Age at  |          |       |                                |         |       |           |        |        | Miscar |
|---------|---------|----------|-------|--------------------------------|---------|-------|-----------|--------|--------|--------|
| Inclusi | Age at  |          |       |                                | Menar   |       | Approval  |        |        | age (M |
| on      | Fontan  | Principa |       |                                | che     | Child | of        | Infer  | Aborti |        |
| Pat     | (years) | (years)  | I CHD | Surgical intervention(s)       | (years) | wish  | Pregnancy | tility | (A)    |        |
|         |         |          |       | III RAAP                       |         |       |           |        |        |        |
| O       | 30      | 9        | TA    | I Rashkind + Waterston         | 13      | Yes   | No        | No     | No     |        |
|         |         |          |       | II BT                          |         |       |           |        |        |        |
|         |         |          |       | III RA-AP                      |         |       |           |        |        |        |
| P       | 35      | 8        | TA    | I Glenn                        | 14      | Yes   | No        | Yes    | 1 (M)  |        |
|         |         |          |       | II RA-RV Fontan                |         |       |           |        |        |        |
|         |         |          |       | III Conduit replacement        |         |       |           |        |        |        |
|         |         |          |       | IV Implantation of St Jude     |         |       |           |        |        |        |
|         |         |          |       | valve RA-RV                    |         |       |           |        |        |        |
|         |         |          |       | V Redo RA-AP                   |         |       |           |        |        |        |
| Q       | 27      | 6        | TA    | I RA-AP                        | 17      | No    | No        | No     | No     |        |
| R       | 21      | 5        | DILV  | I RA-AP                        | 16      | Yes   | No        | No     | No     |        |
| S       | 30      | 10       | DILV  | I RA-AP                        | 14      | Yes   | No        | No     | No     |        |
| T       | 28      | 6        | TA    | I RA-AP                        | 18      | Yes   | No        | No     | No     |        |
| U       | 34      | 8        | DILV  | I RA-AP                        | 13      | Yes   | No        | Yes    | 3 (M)  |        |
| V       | 35      | 10       | TA    | I RA-AP                        | 13      | Yes   | Yes       | Yes    | No     |        |
| W       | 23      | 9        | DORV  | I RA-AP                        | 13      | Yes   | Yes       | No     | No     |        |
|         |         |          |       | RARV (Atrioventricular) Fontan |         |       |           |        |        |        |
| X       | 31      | 7        | TA    | I BT                           | 13      | No    | Unknown   | No     | No     |        |
|         |         |          |       | II RA-RV                       |         |       |           |        |        |        |
|         |         |          |       | III Redo RA-RV                 |         |       |           |        |        |        |

|                                               | <b>Age at</b>  |                 |              |                                                                                                                         |                |              |                  |               |               | <b>Miscar</b> |
|-----------------------------------------------|----------------|-----------------|--------------|-------------------------------------------------------------------------------------------------------------------------|----------------|--------------|------------------|---------------|---------------|---------------|
| <b>Inclusi</b>                                | <b>Age at</b>  |                 |              |                                                                                                                         | <b>Menar</b>   |              | <b>Approval</b>  |               |               | <b>age (M</b> |
| <b>on</b>                                     | <b>Fontan</b>  | <b>Principa</b> |              |                                                                                                                         | <b>che</b>     | <b>Child</b> | <b>of</b>        | <b>Infer</b>  | <b>Aborti</b> |               |
| <b>Pat</b>                                    | <b>(years)</b> | <b>(years)</b>  | <b>I CHD</b> | <b>Surgical intervention(s)</b>                                                                                         | <b>(years)</b> | <b>wish</b>  | <b>Pregnancy</b> | <b>tility</b> | <b>(A)</b>    |               |
| Y                                             | 31             | 7               | TA           | I RA-RV, ASD/VSD<br>closure, RVOT procedure<br>II Redo RA-RV                                                            | 14             | Yes          | No               | No            | No            | No            |
| Z                                             | 22             | 4               | TA           | I PA banding<br>II RA-RV, PA band<br>removal, ASD/VSD<br>closure, pulmonary<br>arterioplasty<br>III Conduit replacement | 18             | Yes          | Unknown          | No            | No            | No            |
| AA                                            | 33             | 7               | TA           | I BT<br>II RA-RV<br>III Conduit replacement                                                                             | 17             | Yes          | No               | No            | No            | No            |
| BB                                            | 36             | 14              | TA           | I BT<br>II RA-RV , ASD/VSD<br>closure                                                                                   | 13             | Yes          | No               | Yes           | 1 (A)         |               |
| TCPC (total cavo-pulmonary connection) Fontan |                |                 |              |                                                                                                                         |                |              |                  |               |               |               |
| CC                                            | 31             | 3               | TA           | I BT, RVOT procedure<br>II RA-RV<br>III Conduit replacement<br>IV Take down Fontan +<br>Glenn                           | 12             | Yes          | No               | No            | No            | No            |

|             | Age at  |          |                          |                 |         |          |           |        |        | Miscar |
|-------------|---------|----------|--------------------------|-----------------|---------|----------|-----------|--------|--------|--------|
| Inclusi     | Age at  |          |                          |                 | Menar   | Approval |           |        |        | age (M |
| on          | Fontan  | Principa |                          |                 | che     | Child of |           | Infer  | Aborti |        |
| Pat (years) | (years) | I CHD    | Surgical intervention(s) |                 | (years) | wish     | Pregnancy | tility | (A)    |        |
|             |         |          | V Redo-TCPC              |                 |         |          |           |        |        |        |
| DD          | 24      | 5        | TA                       | I Waterston     | 16      | No       | No        | No     | No     |        |
|             |         |          | II RA-AP                 |                 |         |          |           |        |        |        |
|             |         |          | III Glenn                |                 |         |          |           |        |        |        |
|             |         |          | IV Redo TCPC             |                 |         |          |           |        |        |        |
| EE          | 36      | 11       | TA                       | I Glenn         | 16      | Yes      | Unknown   | No     | No     |        |
|             |         |          | II RA-RV +VSD/ASD        |                 |         |          |           |        |        |        |
|             |         |          | closure                  |                 |         |          |           |        |        |        |
|             |         |          | III Redo-TCPC            |                 |         |          |           |        |        |        |
| FF          | 38      | 13       | TA                       | I Rashkind + BT | 13      | No       | Yes       | No     | No     |        |
|             |         |          | II RA-AP                 |                 |         |          |           |        |        |        |
|             |         |          | V Redo-TCPC              |                 |         |          |           |        |        |        |
| GG          | 30      | 5        | TA                       | I BT            | 18      | Yes      | No        | No     | No     |        |
|             |         |          | II Redo BT               |                 |         |          |           |        |        |        |
|             |         |          | III RVOT procedure,      |                 |         |          |           |        |        |        |
|             |         |          | VSD enlargement          |                 |         |          |           |        |        |        |
|             |         |          | IV RAAP                  |                 |         |          |           |        |        |        |
|             |         |          | V Redo RAAP              |                 |         |          |           |        |        |        |
|             |         |          | VI Redo TCPC             |                 |         |          |           |        |        |        |
| HH          | 31      | 5        | TA                       | I BT            | 19      | Yes      | Yes       | No     | No     |        |
|             |         |          | II RA-AP, ASD/PDA        |                 |         |          |           |        |        |        |

| <b>Pat</b> | <b>Inclusion</b> | <b>Age at Fontan (years)</b> | <b>Principa l CHD</b> | <b>Surgical intervention(s)</b>                                   | <b>Menar che (years)</b> | <b>Child wish</b> | <b>Approval of Pregnancy</b> | <b>Infer tility</b> | <b>Miscar age (M) Aborti (A)</b> |
|------------|------------------|------------------------------|-----------------------|-------------------------------------------------------------------|--------------------------|-------------------|------------------------------|---------------------|----------------------------------|
|            |                  |                              |                       | closure, pulmonary arterioplasty<br>III Redo TCPC                 |                          |                   |                              |                     |                                  |
| II         | 21               | 8                            | UVH                   | I BT (left)<br>II BT (right)<br>III TCPC, pulmonary arterioplasty | 12                       | Yes               | No                           | No                  | No                               |
| JJ         | 30               | 10                           | TA                    | I BT<br>II RA-RV<br>III Redo RA-RV<br>IV Redo TCPC                | 17                       | Yes               | Yes                          | No                  | No                               |
| KK         | 24               | 9                            | UVH                   | I BT<br>II TCPC                                                   | 13                       | Yes               | Yes                          | No                  | No                               |
| LL         | 30               | 25                           | AVSD + RV hypoplasia  | I TCPC + PA banding                                               | 11                       | Yes               | Yes                          | Yes                 | 1 (M)                            |

ASD, atrial septal defect; AVSD, atrioventricular septal defect; BT, Blalock-Taussig shunt; DILV, double inlet left ventricle; DORV, double outlet right ventricle; Glenn, bi-directional Glenn anastomosis; PA, pulmonary artery; PAIVS, pulmonary atresia with an intact ventricular septum; PDA, persistent ductus arteriosus; RA-AP, atriopulmonary

connection type Fontan; RA-RV, atrioventricular connection type Fontan; RV, right ventricle; TA, tricuspid atresia; TCPC, total cavopulmonary connection; Fontan UVH, univentricular heart.
